# Supplementary material
Source: PubMed Central journal article supplement (PMC8916708)
Supplement: NIHMS1774308-supplement-Supplemental_materials.pdf [file NIHMS1774308-supplement-Supplemental_materials.pdf]

**Genetic variants of *CHEK1*, *PRIM2* and *CDK6* in the mitotic phase-related pathway are associated with non-small cell lung cancer survival**

**List of Authors:**

Rui Mu; Hongliang Liu; Sheng Luo; Edward F. Patz Jr.; Carolyn Glass; Li Su; Mulong Du; David C. Christiani; Lei Jin; Qingyi Wei

| <b>Contents</b>          |                                                                                                                                                                                                 |            |
|--------------------------|-------------------------------------------------------------------------------------------------------------------------------------------------------------------------------------------------|------------|
| Supplementary Table S1   | Comparison of characteristics between the PLCO trial and the HLCS study                                                                                                                         | Page 1     |
| Supplementary Table S2   | List of 368 selected genes in mitotic phase-related gene-set used in discovery analysis                                                                                                         | Page 2-3   |
| Supplementary Table S3   | Associations of the first 10 principal components and OS of NSCLC in the PLCO trial                                                                                                             | Page 4     |
| Supplementary Table S4   | Three independent SNPs were adjusted for 41 previously published SNPs for NSCLC in the PLCO Trial                                                                                               | Page 5-6   |
| Supplementary Table S5   | Stratified analysis for associations between (0-1 vs. 2-3) unfavorable genotypes and NSCLC survival in the PLCO trial                                                                           | Page 7     |
| Supplementary Table S6   | Stratified Cox proportional hazards model analysis for clinical covariates and three independent SNPs by the combination of stage and chemotherapy for NSCLC in the PLCO trial                  | Page 8     |
| Supplementary Table S7   | Function prediction for <i>CHEK1</i> rs76744140 and <i>PRIM2</i> rs6939623                                                                                                                      | Page 9     |
| Supplementary Table S8   | Function prediction for <i>CDK6</i> rs113181986 and its 24 high LD ( $r^2 > 0.8$ ) SNPs in <i>CDK6</i>                                                                                          | Page 10-11 |
| Supplementary Figure S1  | Manhattan plot                                                                                                                                                                                  | Page 12    |
| Supplementary Figure S2  | Regional association plots for the three independent SNPs in the mitotic phase-related pathway genes                                                                                            | Page 13    |
| Supplementary Figure S3  | Receiver operating characteristic (ROC) curve and time dependent area under the ROC curve (AUC) estimation for NSCLC OS and DSS prediction using three newly independent SNPs in the PLCO trail | Page 14-15 |
| Supplementary Figure S4  | Testing proportional Hazards assumption by using Schoenfeld residuals plot and zph test                                                                                                         | Page 16    |
| Supplementary Figure S5  | Functional prediction of three independent SNPs in mitotic phase-related pathway genes in the ENCODE data                                                                                       | Page 17    |
| Supplementary Figure S6  | Functional prediction of 10 high LD ( $r^2 > 0.8$ ) SNPs of representative SNP rs113181986 in <i>CDK6</i> in the ENCODE data                                                                    | Page 18    |
| Supplementary Figure S7  | The eQTL analysis for <i>CHEK1</i> rs76744140, <i>PRIM2</i> rs6939623, and <i>CDK6</i> rs113181986 from the GTEx (V8) database                                                                  | Page 19    |
| Supplementary Figure S8  | The eQTL analysis for 19 SNPs had a high LD ( $r^2 > 0.8$ ) with rs113181986 in <i>CDK6</i> from the GTEx (V8) database                                                                         | Page 20    |
| Supplementary Figure S9  | The eQTL analysis for <i>CHEK1</i> rs76744140, <i>PRIM2</i> rs6939623, and <i>CDK6</i> rs113181986 from 1,000 Genomes Project                                                                   | Page 21    |
| Supplementary Figure S10 | Kaplan-Meier analysis for patients with NSCLC by the three genes                                                                                                                                | Page 22    |
| Supplementary Figure S11 | Mutation frequency of <i>CHEK1</i> , <i>PRIM2</i> , and <i>CDK6</i> in non-small cell lung tumor tissues                                                                                        | Page 23    |

**Supplementary Table S1.** Comparison of characteristics between the PLCO trial and the HLCS study

| Characteristics                  | PLCO      |            | HLCS      |            | P*      |
|----------------------------------|-----------|------------|-----------|------------|---------|
|                                  | Frequency | Deaths (%) | Frequency | Deaths (%) |         |
| Total                            | 1,185     | 798 (67.3) | 984       | 665 (67.5) |         |
| Median overall survival (months) | 23.8      |            | 39.9      |            |         |
| Age                              |           |            |           |            |         |
| ≤71                              | 636       | 400 (62.9) | 654       | 428 (65.4) | <0.0001 |
| >71                              | 549       | 398 (72.5) | 330       | 237 (71.8) |         |
| Sex                              |           |            |           |            |         |
| Male                             | 698       | 507 (72.6) | 507       | 379 (74.7) | 0.0006  |
| Female                           | 487       | 291 (59.8) | 477       | 286 (59.9) |         |
| Smoking status                   |           |            |           |            |         |
| Never                            | 115       | 63 (54.8)  | 92        | 52 (56.5)  | 0.166   |
| Current                          | 423       | 272 (64.3) | 390       | 266 (68.2) |         |
| Former                           | 647       | 463 (71.6) | 502       | 347 (69.1) |         |
| Histology                        |           |            |           |            |         |
| Adenocarcinoma                   | 577       | 348 (60.3) | 597       | 378 (63.3) | <0.0001 |
| Squamous cell carcinoma          | 285       | 192 (67.4) | 216       | 156 (72.2) |         |
| Others                           | 323       | 258 (79.9) | 171       | 131 (76.6) |         |
| Tumor stage                      |           |            |           |            |         |
| I-III A                          | 655       | 315 (48.1) | 606       | 352 (58.0) | 0.003   |
| IIIB-IV                          | 528       | 482 (91.3) | 377       | 313 (83.0) |         |
| Missing                          | 2         |            | --        |            |         |

Abbreviations: PLCO, the Prostate, Lung, Colorectal and Ovarian Cancer Screening Trial; HLCS, Harvard Lung Cancer Susceptibility Study.

\* Chi-square test for the comparison of characteristics between the PLCO trial and the HLCS study for each clinical variable.

**Supplementary Table S2.** List of 368 selected genes in mitotic phase-related gene-set used in discovery analysis

| Dataset  | Name of pathway                                                                  | Selected genes <sup>a</sup>                                                                                                                                                                                                                                                                                                                                                                                                                                                                                                                                                                                                                                                                                                                                                                                                                                                      | Number of genes |
|----------|----------------------------------------------------------------------------------|----------------------------------------------------------------------------------------------------------------------------------------------------------------------------------------------------------------------------------------------------------------------------------------------------------------------------------------------------------------------------------------------------------------------------------------------------------------------------------------------------------------------------------------------------------------------------------------------------------------------------------------------------------------------------------------------------------------------------------------------------------------------------------------------------------------------------------------------------------------------------------|-----------------|
| GO       | GO_POSITIVE_REGULATION_OF_G1_S_TRANSITION_OF_MITOTIC_CELL_CYCLE                  | ADAM17, ADAMTS1, AIF1, AKT1, ANKRD17, ANXA1, APEX1, CCND1, CCND2, CCND3, CDC45, CDC6, CDK10, CUL4A, CUL4B, CYP1A1, DDX3X, EGFR, EIF4G1, FGF10, HYAL1, KCNA5, KMT2E, LSM10, LSM11, MDM2, MEPCE, MIR208A, MIR214, MIR221, MIR222, MIR29A, MIR372, MIR495, MIR515-1, MIR515-2, MIR519D, MIR520A, MIR520H, MIR590, MTBP, PLCB1, PLRG1, RDX, RGCC, RPTOR, TERT, TFDP1, UBE2E2                                                                                                                                                                                                                                                                                                                                                                                                                                                                                                         | 49              |
| GO       | GO_MITOTIC_G1_S_TRANSITION_CHECKPOINT                                            | ARID3A, ATM, AURKA, BAX, BTG2, CARM1, CASP2, CCNB1, CCND1, CDC25C, CDK1, CDK2, CDKN1A, CDKN1B, CHEK2, CNOT1, CNOT10, CNOT11, CNOT2, CNOT3, CNOT4, CNOT6, CNOT6L, CNOT7, CNOT8, CNOT9, CRADD, E2F1, E2F4, E2F7, E2F8, EP300, FBXO31, GADD45A, GIGYF2, GML, GTSE1, MDM2, MDM4, MUC1, PCBP4, PCNA, PIDD1, PLAGL1, PLK2, PLK3, PLK5, PML, PRKDC, PRMT1, RBL2, RFWD3, RGCC, RPA2, RPL26, RPS27L, SFN, SOX4, TFDP1, TFDP2, TNKS1BP1, TP53, TRIAP1, ZNF385A                                                                                                                                                                                                                                                                                                                                                                                                                             | 64              |
| GO       | GO_G0_TO_G1_TRANSITION                                                           | APAF1, BMI1, BRCA1, CBX3, CBX5, CCN2, CDC7, CDK3, CHEK1, DAB2IP, DUX4, E2F1, E2F6, EED, EHMT1, EHMT2, EPC1, EZH2, FOXO4, HLA-G, L3MBTL2, MAX, MED1, MGA, MIR424, MIR503, PCGF2, PCGF6, PHC1, PHC3, PPP2R5B, RAD51, RBBP4, RBBP7, RBBP8, RHNO1, RING1, RNF2, RRM2, RYBP, SOX15, SUZ12, TFDP1, TFDP2, UXT, YAF2                                                                                                                                                                                                                                                                                                                                                                                                                                                                                                                                                                    | 46              |
| GO       | GO_EXIT_FROM_MITOSIS                                                             | ANLN, CDC14A, CDC14B, CDC14C, CDC23, CDCA5, CDKN1B, CHMP2A, CHMP4B, CHMP7, CLASP1, CLASP2, CTDSP1, EPS8, KNTC1, MAD2L1BP, NEUROG1, NPM2, PHB2, PPP1R9B, PPP2R2D, RGCC, SIRT2, SIRT7, SPAST, UBE2C, UBE2S, ZW10                                                                                                                                                                                                                                                                                                                                                                                                                                                                                                                                                                                                                                                                   | 28              |
| GO       | GO_MITOTIC_G2_M_TRANSITION_CHECKPOINT                                            | ATM, BLM, BRCA1, BRSK1, CDC6, CDK1, CDK5RAP3, CDKN1A, CLSPN, DONSON, FOXN3, FOXO4, HMGA2, HUS1, HUS1B, MIR21, MRE11, MRNIP, NAE1, NBN, NOP53, ORC1, RAD17, RINT1, SYF2, TAOK1, TAOK2, TAOK3, TICRR, TOPBP1, TRIM39, ZNF830                                                                                                                                                                                                                                                                                                                                                                                                                                                                                                                                                                                                                                                       | 32              |
| GO       | GO_REGULATION_OF_TRANSCRIPTION_INVOLVED_IN_G1_S_TRANSITION_OF_MITOTIC_CELL_CYCLE | BACH1, BRD4, CCNA1, CCNE1, CDC45, CDC6, CDK14, CDK15, CDK16, CDK17, CDK18, CDK5, CDT1, DHFR, DHFRP1, E2F1, E2F4, E2F6, E2F7, ESRRB, FBXO5, GFI1, HINFP, ID2, KLF11, NPAT, ORC1, PCNA, POLA1, RB1, RRM2, TFDP1, TFDP2, TYMS, ZPR1                                                                                                                                                                                                                                                                                                                                                                                                                                                                                                                                                                                                                                                 | 35              |
| GO       | GO_MITOTIC_SISTER_CHROMATID_COHESION                                             | ATRX, BOD1, CDC20, CDCA5, CHTF8, DSCC1, HASPIN, MACROH2A1, MAU2, NAA10, NAA50, NIPBL, NSMCE2, PDS5A, PDS5B, POGZ, RAD21, RAD21L1, RB1, REC8, SGO1, SLF1, SLF2, SMC1A, SMC5, TNKS                                                                                                                                                                                                                                                                                                                                                                                                                                                                                                                                                                                                                                                                                                 | 26              |
| REACTOME | REACTOME_MITOTIC_G1_PHASE_AND_G1_S_TRANSITION                                    | ABL1, AKT1, AKT2, AKT3, CABLES1, CCNA1, CCNA2, CCNB1, CCND1, CCND2, CCND3, CCNE1, CCNE2, CCNH, CDC25A, CDC45, CDC6, CDC7, CDK1, CDK2, CDK4, CDK6, CDK7, CDKN1A, CDKN1B, CDKN1C, CDKN2A, CDKN2B, CDKN2C, CDKN2D, CDT1, CKS1B, CUL1, DBF4, DHFR, DYRK1A, E2F1, E2F2, E2F3, E2F4, E2F5, E2F6, FBXO5, GMNN, HDAC1, JAK2, LIN37, LIN52, LIN54, LIN9, LYN, MAX, MCM10, MCM2, MCM3, MCM4, MCM5, MCM6, MCM7, MCM8, MNAT1, MYBL2, MYC, ORC1, ORC2, ORC3, ORC4, ORC5, ORC6, PCNA, POLA1, POLA2, POLE, POLE2, POLE3, POLE4, PPP2CA, PPP2CB, PPP2R1A, PPP2R1B, PPP2R2A, PPP2R3B, PRIM1, PRIM2, PSMA1, PSMA2, PSMA3, PSMA4, PSMA5, PSMA6, PSMA7, PSMB1, PSMB10, PSMB2, PSMB3, PSMB4, PSMB5, PSMB6, PSMB7, PSMB8, PSMB9, PSMC1, PSMC2, PSMC3, PSMC4, PSMC5, PSMC6, PSMD1, PSMD10, PSMD11, PSMD12, PSMD13, PSMD14, PSMD2, PSMD3, PSMD4, PSMD5, PSMD6, PSMD7, PSMD8, PSMD9, PSME1, PSME2, PSME3, | 149             |

|          |   |                                                                                                                                                                                                                                                                                                                                                                                                                                                                                                                                                                                                                                                                                                                                                                                                                                                                                                                                                                                                                                                                                                                                                                                                                                                                                                                                                                                                                                                                                                                                                                                                                                                                                                                                                                                                                                                                                                                                                                                                                                                                                                                                                                                                                                                                                                                                                                                                                                                                                                                                                                                                                                                      |     |
|----------|---|------------------------------------------------------------------------------------------------------------------------------------------------------------------------------------------------------------------------------------------------------------------------------------------------------------------------------------------------------------------------------------------------------------------------------------------------------------------------------------------------------------------------------------------------------------------------------------------------------------------------------------------------------------------------------------------------------------------------------------------------------------------------------------------------------------------------------------------------------------------------------------------------------------------------------------------------------------------------------------------------------------------------------------------------------------------------------------------------------------------------------------------------------------------------------------------------------------------------------------------------------------------------------------------------------------------------------------------------------------------------------------------------------------------------------------------------------------------------------------------------------------------------------------------------------------------------------------------------------------------------------------------------------------------------------------------------------------------------------------------------------------------------------------------------------------------------------------------------------------------------------------------------------------------------------------------------------------------------------------------------------------------------------------------------------------------------------------------------------------------------------------------------------------------------------------------------------------------------------------------------------------------------------------------------------------------------------------------------------------------------------------------------------------------------------------------------------------------------------------------------------------------------------------------------------------------------------------------------------------------------------------------------------|-----|
|          |   | <i>PSMF1, PTK6, RB1, RBBP4, RBL1, RBL2, RPA1, RPA2, RPA3, RPA4, RPS27A, RRM2, SEM1, SKP1, SKP2, SRC, TFDP1, TFDP2, TK1, TOP2A, TYMS, UBA52, UBB, UBC, WEE1</i>                                                                                                                                                                                                                                                                                                                                                                                                                                                                                                                                                                                                                                                                                                                                                                                                                                                                                                                                                                                                                                                                                                                                                                                                                                                                                                                                                                                                                                                                                                                                                                                                                                                                                                                                                                                                                                                                                                                                                                                                                                                                                                                                                                                                                                                                                                                                                                                                                                                                                       |     |
| KEGG     | - | -                                                                                                                                                                                                                                                                                                                                                                                                                                                                                                                                                                                                                                                                                                                                                                                                                                                                                                                                                                                                                                                                                                                                                                                                                                                                                                                                                                                                                                                                                                                                                                                                                                                                                                                                                                                                                                                                                                                                                                                                                                                                                                                                                                                                                                                                                                                                                                                                                                                                                                                                                                                                                                                    | 0   |
| PID      | - | -                                                                                                                                                                                                                                                                                                                                                                                                                                                                                                                                                                                                                                                                                                                                                                                                                                                                                                                                                                                                                                                                                                                                                                                                                                                                                                                                                                                                                                                                                                                                                                                                                                                                                                                                                                                                                                                                                                                                                                                                                                                                                                                                                                                                                                                                                                                                                                                                                                                                                                                                                                                                                                                    | 0   |
| BIOCARTA | - | -                                                                                                                                                                                                                                                                                                                                                                                                                                                                                                                                                                                                                                                                                                                                                                                                                                                                                                                                                                                                                                                                                                                                                                                                                                                                                                                                                                                                                                                                                                                                                                                                                                                                                                                                                                                                                                                                                                                                                                                                                                                                                                                                                                                                                                                                                                                                                                                                                                                                                                                                                                                                                                                    | 0   |
| Total    |   | <i>ABL1, AKT1, AKT2, AKT3, CABLES1, CCNA1, CCNA2, CCNB1, CCND1, CCND2, CCND3, CCNE1, CCNE2, CCNH, CDC25A, CDC45, CDC6, CDC7, CDK1, CDK2, CDK4, CDK6, CDK7, CDKN1A, CDKN1B, CDKN1C, CDKN2A, CDKN2B, CDKN2C, CDKN2D, CDT1, CKS1B, CUL1, DBF4, DHFR, DYRK1A, E2F1, E2F2, E2F3, E2F4, E2F5, E2F6, FBXO5, GMNN, HDAC1, JAK2, LIN37, LIN52, LIN54, LIN9, LYN, MAX, MCM10, MCM2, MCM3, MCM4, MCM5, MCM6, MCM7, MCM8, MNAT1, MYBL2, MYC, ORC1, ORC2, ORC3, ORC4, ORC5, ORC6, PCNA, POLA1, POLA2, POLE, POLE2, POLE3, POLE4, PPP2CA, PPP2CB, PPP2R1A, PPP2R1B, PPP2R2A, PPP2R3B, PRIM1, PRIM2, PSMA1, PSMA2, PSMA3, PSMA4, PSMA5, PSMA6, PSMA7, PSMB1, PSMB10, PSMB2, PSMB3, PSMB4, PSMB5, PSMB6, PSMB7, PSMB8, PSMB9, PSMC1, PSMC2, PSMC3, PSMC4, PSMC5, PSMC6, PSMD1, PSMD10, PSMD11, PSMD12, PSMD13, PSMD14, PSMD2, PSMD3, PSMD4, PSMD5, PSMD6, PSMD7, PSMD8, PSMD9, PSME1, PSME2, PSME3, PSMF1, PTK6, RB1, RBBP4, RBL1, RBL2, RPA1, RPA2, RPA3, RPA4, RPS27A, RRM2, SEM1, SKP1, SKP2, SRC, TFDP1, TFDP2, TK1, TOP2A, TYMS, UBA52, UBB, UBC, WEE1, ADAM17, ADAMTS1, AIF1, ANKRD17, ANXA1, APEX1, CDK10, CUL4A, CUL4B, CYP1A1, DDX3X, EGFR, EIF4G1, FGF10, HYAL1, KCNA5, KMT2E, LSM10, LSM11, MDM2, MEPCE, MIR208A, MIR214, MIR221, MIR222, MIR29A, MIR372, MIR495, MIR515-1, MIR515-2, MIR519D, MIR520A, MIR520H, MIR590, MTBP, PLCB1, PLRG1, RDX, RGCC, RPTOR, TERT, UBE2E2, APAF1, BMI1, BRCA1, CBX3, CBX5, CCN2, CDK3, CHEK1, DAB2IP, DUX4, EED, EHMT1, EHMT2, EPC1, EZH2, FOXO4, HLA-G, L3MBTL2, MED1, MGA, MIR424, MIR503, PCGF2, PCGF6, PHC1, PHC3, PPP2R5B, RAD51, RBBP7, RBBP8, RHNO1, RING1, RNF2, RYBP, SOX15, SUZ12, UXT, YAF2, ANLN, CDC14A, CDC14B, CDC14C, CDC23, CDCA5, CHMP2A, CHMP4B, CHMP7, CLASP1, CLASP2, CTD1P1, EPS8, KNTC1, MAD2L1BP, NEUROG1, NPM2, PHB2, PPP1R9B, PPP2R2D, SIRT2, SIRT7, SPAST, UBE2C, UBE2S, ZW10, ATM, BLM, BRSK1, CDK5RAP3, CLSPN, DONSON, FOXN3, HMGA2, HUS1, HUS1B, MIR21, MRE11, MRNIP, NAE1, NBN, NOP53, RAD17, RINT1, SYF2, TAOK1, TAOK2, TAOK3, TICRR, TOPBP1, TRIM39, ZNF830, BACH1, BRD4, CDK14, CDK15, CDK16, CDK17, CDK18, CDK5, E2F7, ESRRB, GFI1, HINFP, ID2, KLF11, NPAT, ZPR1, ATRX, BOD1, CDC20, CHTF8, DSCC1, HASPIN, MACROH2A1, MAU2, NAA10, NAA50, NIPBL, NSMCE2, PDS5A, PDS5B, POGZ, RAD21, RAD21L1, REC8, SGO1, SLF1, SLF2, SMC1A, SMC5, TNKS, ARID3A, AURKA, BAX, BTG2, CARM1, CASP2, CDC25C, CHEK2, CNOT1, CNOT10, CNOT11, CNOT2, CNOT3, CNOT4, CNOT6, CNOT6L, CNOT7, CNOT8, CNOT9, CRADD, E2F8, EP300, FBXO31, GADD45A, GIGYF2, GML, GTSE1, MDM4, MUC1, PCBP4, PIDD1, PLAGL1, PLK2, PLK3, PLK5, PML, PRKDC, PRMT1, RFWD3, RPL26, RPS27L, SFN, SOX4, TNKS1BP1, TP53, TRIAP1, ZNF385A</i> | 368 |

<sup>a</sup> Genes were selected based on online datasets (<http://software.broadinstitute.org/gsea/msigdb/search.jsp>) and literatures;

<sup>b</sup> 50 duplicated genes and 1 pseudogene had been excluded;

Keyword: Mitotic AND phase;

Organism: Homo sapiens.

**Supplementary Table S3.** Associations of the first 10 principal components and OS of NSCLC in the PLCO trial

| <b>PC*</b> | <b>Parameter Estimate</b> | <b>Standard Error</b> | <b>Chi-Square</b> | <b>P</b>         |
|------------|---------------------------|-----------------------|-------------------|------------------|
| <b>PC1</b> | <b>4.821</b>              | <b>1.353</b>          | <b>12.697</b>     | <b>&lt;0.001</b> |
| <b>PC2</b> | <b>-0.681</b>             | <b>1.228</b>          | <b>0.308</b>      | <b>0.579</b>     |
| <b>PC3</b> | <b>-3.054</b>             | <b>0.949</b>          | <b>10.351</b>     | <b>0.001</b>     |
| <b>PC4</b> | <b>-2.837</b>             | <b>1.246</b>          | <b>5.184</b>      | <b>0.023</b>     |
| PC5        | -0.910                    | 1.232                 | 0.546             | 0.460            |
| PC6        | 1.355                     | 1.252                 | 1.172             | 0.279            |
| PC7        | -0.236                    | 1.218                 | 0.038             | 0.846            |
| PC8        | -1.684                    | 1.322                 | 1.622             | 0.203            |
| PC9        | -1.886                    | 1.267                 | 2.216             | 0.137            |
| PC10       | 0.347                     | 1.240                 | 0.078             | 0.180            |

Abbreviations: OS, overall survival; NSCLC, non-small cell lung cancer; PLCO, the Prostate, Lung, Colorectal and Ovarian Cancer Screening Trial; PC, principal component.

\* The first 4 PC were used for adjustment for population stratification in the multivariate analysis.

**Supplementary Table S4.** Three independent SNPs were adjusted for 41 previously published SNPs for NSCLC in the PLCO Trial

| <b>Variables</b> | <b>Allele<sup>a</sup></b> | <b>HR (95% CI)</b> | <b>P</b> |
|------------------|---------------------------|--------------------|----------|
| rs779901         | C/T                       | 0.80 (0.68-0.94)   | 0.008    |
| rs3806116        | G/T                       | 1.18 (1.06-1.32)   | 0.003    |
| rs199731120      | C/CA                      | 1.15 (0.95-1.39)   | 0.153    |
| rs10794069       | A/G                       | 1.15 (1.02-1.30)   | 0.025    |
| rs1732793        | G/A                       | 1.20 (1.04-1.38)   | 0.013    |
| rs225390         | G/A                       | 0.87 (0.75-1.02)   | 0.088    |
| rs3788142        | G/A                       | 1.16 (1.02-1.31)   | 0.024    |
| rs73049469       | C/A                       | 1.31 (1.10-1.56)   | 0.003    |
| rs35970494       | T/TC                      | 1.03 (0.87-1.22)   | 0.733    |
| rs225388         | G/A                       | 1.02 (0.88-1.18)   | 0.824    |
| rs7553295        | G/T                       | 0.84 (0.74-0.95)   | 0.006    |
| rs1279590        | G/A                       | 0.86 (0.73-1.00)   | 0.052    |
| rs73534533       | C/A                       | 0.73 (0.60-0.89)   | 0.002    |
| rs677844         | T/C                       | 0.85 (0.75-0.97)   | 0.013    |
| rs4978754        | C/T                       | 0.83 (0.68-1.02)   | 0.077    |
| rs1555195        | C/T                       | 0.85 (0.75-0.97)   | 0.012    |
| rs11660748       | A/G                       | 1.27 (1.08-1.50)   | 0.005    |
| rs73440898       | A/G                       | 1.14 (0.95-1.37)   | 0.148    |
| rs13040574       | C/A                       | 0.86 (0.77-0.96)   | 0.007    |
| rs469783         | T/C                       | 0.84 (0.75-0.94)   | 0.002    |
| rs36071574       | G/A                       | 1.32 (1.04-1.67)   | 0.021    |
| rs7242481        | G/A                       | 0.87 (0.78-0.98)   | 0.019    |
| rs1049493        | T/C                       | 0.90 (0.81-1.01)   | 0.065    |
| rs1801701        | C/T                       | 0.79 (0.65-0.96)   | 0.018    |
| rs35859010       | C/T                       | 0.82 (0.71-0.96)   | 0.011    |

|                    |            |                         |              |
|--------------------|------------|-------------------------|--------------|
| rs1833970          | T/A        | 0.84 (0.75-0.94)        | 0.003        |
| rs254315           | T/C        | 1.26 (1.00-1.46)        | 0.002        |
| rs425904           | T/C        | 1.24 (1.09-1.41)        | 0.001        |
| rs35385129         | C/A        | 0.80 (0.69-0.94)        | 0.005        |
| rs4487030          | A/G        | 0.85 (0.77-0.95)        | 0.004        |
| rs60571065         | T/A        | 1.06 (0.89-1.26)        | 0.505        |
| rs13213007         | G/A        | 1.16 (1.02-1.31)        | 0.021        |
| rs115613985        | T/A        | 1.21 (1.08-1.36)        | 0.001        |
| rs9673682          | T/G        | 0.94 (0.84-1.05)        | 0.278        |
| rs2011404          | C/T        | 0.83 (0.71-0.96)        | 0.013        |
| rs7867814          | G/A        | 1.12 (0.95-1.32)        | 0.171        |
| rs2547235          | C/T        | 1.23 (1.06-1.42)        | 0.005        |
| rs4733124          | T/C        | 1.30 (1.12-1.50)        | 0.001        |
| rs11225211         | G/A        | 0.82 (0.70-0.95)        | 0.008        |
| rs11787670         | A/G        | 0.84 (0.69-1.04)        | 0.113        |
| rs67715745         | T/C        | 0.90 (0.77-1.04)        | 0.150        |
| <b>rs76744140</b>  | <b>T/C</b> | <b>1.35 (1.09-1.66)</b> | <b>0.006</b> |
| <b>rs6939623</b>   | <b>G/T</b> | <b>1.24 (1.03-1.50)</b> | <b>0.021</b> |
| <b>rs113181986</b> | <b>G/C</b> | <b>0.77 (0.60-1.00)</b> | <b>0.046</b> |

---

Abbreviations: SNP: single-nucleotide polymorphisms; NSCLC, non-small cell lung cancer; PLCO, the Prostate, Lung, Colorectal and Ovarian cancer screening trial; HR: hazards ratio; CI: confidence interval;

<sup>a</sup> Reference/effect allele.

**Supplementary Table S5.** Stratified analysis for associations between (0-1 vs. 2-3) unfavorable genotypes and NSCLC survival in the PLCO trial

| Characteristics | 0-1 unfavorable genotype | 2-3 unfavorable genotype | Multivariate Analysis <sup>b</sup> for OS |          |                                        | Multivariate Analysis <sup>b</sup> for DSS |          |                                        |
|-----------------|--------------------------|--------------------------|-------------------------------------------|----------|----------------------------------------|--------------------------------------------|----------|----------------------------------------|
|                 | Frequency <sup>a</sup>   | Frequency <sup>a</sup>   | HR (95% CI)                               | <i>P</i> | <i>P</i> <sub>inter</sub> <sup>c</sup> | HR (95% CI)                                | <i>P</i> | <i>P</i> <sub>inter</sub> <sup>c</sup> |
| Age (years)     |                          |                          |                                           |          | 0.628                                  |                                            |          | 0.666                                  |
| ≤ 71            | 472                      | 162                      | 1.31 (1.05-1.63)                          | 0.016    |                                        | 1.30 (1.03-1.64)                           | 0.026    |                                        |
| > 71            | 400                      | 141                      | 1.41 (1.12-1.77)                          | 0.003    |                                        | 1.36 (1.06-1.72)                           | 0.016    |                                        |
| Sex             |                          |                          |                                           |          | 0.236                                  |                                            |          | 0.227                                  |
| Male            | 509                      | 186                      | 1.39 (1.15-1.69)                          | 0.001    |                                        | 1.36 (1.11-1.68)                           | 0.004    |                                        |
| Female          | 363                      | 117                      | 1.46 (1.12-1.89)                          | 0.005    |                                        | 1.41 (1.07-1.86)                           | 0.014    |                                        |
| Smoking status  |                          |                          |                                           |          | 0.441                                  |                                            |          | 0.746                                  |
| Never           | 80                       | 34                       | 1.37 (0.77-2.44)                          | 0.279    |                                        | 1.32 (0.74-2.36)                           | 0.345    |                                        |
| Current         | 321                      | 96                       | 1.28 (0.96-1.72)                          | 0.095    |                                        | 1.19 (0.87-1.63)                           | 0.277    |                                        |
| Former          | 471                      | 173                      | 1.48 (1.21-1.81)                          | <0.001   |                                        | 1.47 (1.19-1.82)                           | <0.001   |                                        |
| Histology       |                          |                          |                                           |          | 0.005                                  |                                            |          | 0.016                                  |
| Adeno           | 428                      | 147                      | 1.44 (1.14-1.81)                          | 0.003    |                                        | 1.39 (1.09-1.78)                           | 0.008    |                                        |
| Squamous        | 211                      | 73                       | 1.32 (0.95-1.84)                          | 0.103    |                                        | 1.28 (0.89-1.84)                           | 0.191    |                                        |
| Others          | 233                      | 83                       | 1.42 (1.07-1.89)                          | 0.017    |                                        | 1.38 (1.02-1.88)                           | 0.036    |                                        |
| Tumor stage     |                          |                          |                                           |          | 0.005                                  |                                            |          | 0.053                                  |
| I-III A         | 499                      | 155                      | 1.65 (1.29-2.12)                          | <0.001   |                                        | 1.61 (1.22-2.12)                           | <0.001   |                                        |
| III B-IV        | 373                      | 148                      | 1.19 (0.98-1.46)                          | 0.086    |                                        | 1.19 (0.97-1.46)                           | 0.105    |                                        |
| Chemotherapy    |                          |                          |                                           |          | 0.002                                  |                                            |          | 0.022                                  |
| No              | 473                      | 165                      | 1.38 (1.10-1.73)                          | 0.006    |                                        | 1.28 (1.00-1.65)                           | 0.051    |                                        |
| Yes             | 399                      | 138                      | 1.29 (1.04-1.61)                          | 0.022    |                                        | 1.30 (1.04-1.62)                           | 0.023    |                                        |
| Radiotherapy    |                          |                          |                                           |          | 0.018                                  |                                            |          | 0.028                                  |
| No              | 557                      | 204                      | 1.37 (1.12-1.67)                          | 0.002    |                                        | 1.37 (1.11-1.71)                           | 0.004    |                                        |
| Yes             | 315                      | 99                       | 1.27 (0.99-1.64)                          | 0.064    |                                        | 1.22 (0.93-1.59)                           | 0.148    |                                        |
| Surgery         |                          |                          |                                           |          | 0.013                                  |                                            |          | 0.029                                  |
| No              | 467                      | 168                      | 1.26 (1.04-1.52)                          | 0.019    |                                        | 1.24 (1.02-1.51)                           | 0.031    |                                        |
| Yes             | 405                      | 135                      | 1.55 (1.17-2.05)                          | 0.003    |                                        | 1.58 (1.15-2.17)                           | 0.005    |                                        |

Abbreviations: OS, overall survival; DSS, disease-specific survival; NSCLC, non-small cell lung cancer; PLCO, the Prostate, Lung, Colorectal and Ovarian Cancer Screening Trial; HR, hazards ratio; CI, confidence interval.

<sup>a</sup> 10 with missing data were excluded;

<sup>b</sup> Adjusted for age, sex, stage, histology, smoking status, chemotherapy, radiotherapy, surgery, PC1, PC2, PC3 and PC4;

<sup>c</sup> *P*<sub>inter</sub>: *P* value for interaction analysis between characteristics and unfavorable genotypes.



**Supplementary Table S6.** Stratified Cox proportional hazards model analysis for clinical covariates and three independent SNPs by the combination of stage and chemotherapy for NSCLC in the PLCO trial

| Characteristics         | Category                | zph <i>P</i> <sup>a</sup> | HR (95% CI) <sup>b</sup> | <i>P</i> <sup>b</sup> |
|-------------------------|-------------------------|---------------------------|--------------------------|-----------------------|
| Age (years)             | Continuous              | 0.102                     | 1.03 (1.02-1.05)         | <0.0001               |
| Sex                     | Male                    | --                        | 1.00                     | --                    |
|                         | Female                  | 0.405                     | 0.79 (0.68-0.91)         | 0.002                 |
| Smoking status          | Never                   | --                        | 1.00                     | --                    |
|                         | Current                 | 0.537                     | 1.74 (1.30-2.33)         | 0.0002                |
|                         | Former                  | 0.964                     | 1.64 (1.25-2.17)         | 0.0004                |
| Histology               | Adenocarcinoma          | --                        | 1.00                     | --                    |
|                         | Squamous cell carcinoma | 0.211                     | 1.12 (0.93-1.35)         | 0.231                 |
|                         | Others                  | 0.586                     | 1.23 (1.03-1.45)         | 0.020                 |
| Radiotherapy            | No                      | --                        | 1.00                     | --                    |
|                         | Yes                     | 0.196                     | 0.90 (0.76-1.06)         | 0.197                 |
| Surgery                 | No                      | --                        | 1.00                     | --                    |
|                         | Yes                     | 0.130                     | 0.25 (0.19-0.32)         | <0.0001               |
| <i>CHEK1</i> rs76744140 | TT/TC/CC                | 0.118                     | 1.24 (1.03-1.50)         | 0.026                 |
| <i>PRIM2</i> rs6939623  | GG/GT/TT                | 0.350                     | 1.32 (1.11-1.56)         | 0.001                 |
| <i>CDK6</i> rs113181986 | GG/GC/CC                | 0.492                     | 0.81 (0.64-1.02)         | 0.077                 |

Abbreviations: SNP: single-nucleotide polymorphisms; NSCLC, non-small cell lung cancer; PLCO, the Prostate, Lung, Colorectal and Ovarian cancer screening trial; HR: hazards ratio; CI: confidence interval;

<sup>a</sup> zph test of stratified Cox proportional hazards model by the combination of stage and chemotherapy;

<sup>b</sup> Adjusted for age, sex, smoking status, histology, radiotherapy, surgery, PC1, PC2, PC3 and PC4.

**Supplementary Table S7.** Function prediction for *CHEK1* rs76744140 and *PRIM2* rs6939623

| SNP        | Gene         | Chr | RegDB <sup>a</sup> | Haploreg v4.1 <sup>b</sup> |                        |       |                |                  |                    |                  |
|------------|--------------|-----|--------------------|----------------------------|------------------------|-------|----------------|------------------|--------------------|------------------|
|            |              |     |                    | Promoter histone marks     | Enhancer histone marks | DNase | Proteins bound | Motifs changed   | Selected eQTL hits | dbSNP func annot |
| rs76744140 | <i>CHEK1</i> | 11  | 7                  | --                         | LNG                    | --    | --             | BDP1,KAP1        | 2 hits             | intronic         |
| rs6939623  | <i>PRIM2</i> | 6   | 5                  | --                         | --                     | PANC  | --             | 5 altered motifs | --                 | intronic         |

Abbreviations: SNP, single nucleotide polymorphism; Chr, chromosome; DNase, deoxyribonuclease; eQTL, expression quantitative trait loci; dbSNP func annot, dbSNP function annotation;

<sup>a</sup> <http://regulomedb.org/>

<sup>b</sup> Haploreg: <https://pubs.broadinstitute.org/mammals/haploreg/haploreg.php>

**Supplementary Table S8.** Function prediction for *CDK6* rs113181986 and its 24 high LD ( $r^2 > 0.8$ ) SNPs in *CDK6*.

| SNP         | Gene                    | Chr | RegDB <sup>a</sup> | Haploreg v4.1 <sup>b</sup> |                        |                        |             |                      |                   |                    |                  |
|-------------|-------------------------|-----|--------------------|----------------------------|------------------------|------------------------|-------------|----------------------|-------------------|--------------------|------------------|
|             |                         |     |                    | LD ( $r^2$ )               | Promoter histone marks | Enhancer histone marks | DNase       | Proteins bound       | Motifs changed    | Selected eQTL hits | dbSNP func annot |
| rs10277569  | 2.9kb 3' of <i>CDK6</i> | 7   | 3a                 | 0.94                       | --                     | --                     | BLD         | --                   | 12 altered motifs | --                 | --               |
| rs10277576  | 2.9kb 3' of <i>CDK6</i> | 7   | 5                  | 0.94                       | --                     | --                     | BLD         | --                   | LBP-1,STAT        | --                 | --               |
| rs76682494  | 1.4kb 3' of <i>CDK6</i> | 7   | 4                  | 0.94                       | --                     | 4 tissues              | BLD         | --                   | AP-2,AP-4,p53     | 1 hit              | --               |
| rs36045255  | 1.4kb 3' of <i>CDK6</i> | 7   | 5                  | 0.94                       | --                     | 4 tissues              | LIV,SKIN    | --                   | 5 altered motifs  | --                 | --               |
| rs113665429 | <i>CDK6</i>             | 7   | 6                  | 0.92                       | IPSC, PANC             | ESC, IPSC              | --          | --                   | 11 altered motifs | --                 | 3'-UTR           |
| rs76908789  | <i>CDK6</i>             | 7   | 3a                 | 0.92                       | 14 tissues             | 7 tissues              | 17 tissues  | ERALPHA_A, TCF4,ELF1 | 13 altered motifs | --                 | 3'-UTR           |
| rs3731384   | <i>CDK6</i>             | 7   | 2b                 | 0.95                       | --                     | 4 tissues              | 13 tissues  | CTCF                 | 31 altered motifs | --                 | intronic         |
| rs3731380   | <i>CDK6</i>             | 7   | 3a                 | 0.95                       | --                     | HRT, MUS               | MUS         | --                   | 4 altered motifs  | --                 | intronic         |
| rs3731373   | <i>CDK6</i>             | 7   | 5                  | 0.95                       | --                     | BLD, MUS               | --          | --                   | Mxi1,Myc,ZEB1     | --                 | intronic         |
| rs3731348   | <i>CDK6</i>             | 7   | 5                  | 1.00                       | --                     | 5 tissues              | --          | --                   | Foxl1,HMG-IY,Mef2 | --                 | intronic         |
| rs75427382  | <i>CDK6</i>             | 7   | 2a                 | 1.00                       | --                     | 5 tissues              | HRT,KID,MUS | --                   | NF-I,TLX1::NFIC   | --                 | intronic         |
| rs61628822  | <i>CDK6</i>             | 7   | 3a                 | 1.00                       | --                     | 5 tissues              | ADRL        | --                   | Dlx2,Dlx3,Sox     | --                 | intronic         |
| rs111450372 | <i>CDK6</i>             | 7   | 3a                 | 1.00                       | --                     | 12 tissues             | SKIN,VAS    | --                   | 15 altered motifs | --                 | intronic         |
| rs76230393  | <i>CDK6</i>             | 7   | 4                  | 0.97                       | BLD                    | BLD, HRT, MUS          | ADRL,HRT    | --                   | --                | --                 | intronic         |
| rs79355747  | <i>CDK6</i>             | 7   | 2a                 | 0.90                       | 11 tissues             | 15 tissues             | 41 tissues  | 4 bound proteins     | 4 altered motifs  | --                 | intronic         |
| rs113181986 | <i>CDK6</i>             | 7   | 6                  | 1.00                       | --                     | BLD, THYM              | --          | --                   | CTCF,Myf,RP58     | --                 | intronic         |
| rs75237922  | <i>CDK6</i>             | 7   | 5                  | 0.97                       | BLD                    | 7 tissues              | 4 tissues   | --                   | 4 altered motifs  | --                 | intronic         |
| rs77183195  | <i>CDK6</i>             | 7   | 3a                 | 1.00                       | --                     | 21 tissues             | 8 tissues   | GATA1                | 7 altered motifs  | --                 | intronic         |

|             |      |   |    |      |                  |                 |            |      |                          |    |          |
|-------------|------|---|----|------|------------------|-----------------|------------|------|--------------------------|----|----------|
| rs3731334   | CDK6 | 7 | 4  | 1.00 | GI, LNG,<br>CRVX | 14 tissues      | 10 tissues | --   | Myc                      | -- | intronic |
| rs113861828 | CDK6 | 7 | 4  | 0.97 | --               | 10 tissues      | HRT        | EBF1 | NRSF,Sin3Ak-<br>20       | -- | intronic |
| rs76527309  | CDK6 | 7 | 6  | 1.00 | --               | BLD, BRN,<br>GI | SKIN       | --   | 13 altered<br>motifs     | -- | intronic |
| rs79835522  | CDK6 | 7 | 3a | 1.00 | --               | 7 tissues       | 9 tissues  | --   | ERalpha-<br>a,TBX5,Tgif1 | -- | intronic |
| rs78716704  | CDK6 | 7 | 7  | 1.00 | --               | BLD             | SKIN       | --   | PRDM1                    | -- | intronic |
| rs113793043 | CDK6 | 7 | 5  | 0.89 | --               | BLD             | --         | --   | --                       | -- | intronic |
| rs111702206 | CDK6 | 7 | 3a | 0.85 | --               | 4 tissues       | 6 tissues  | --   | Nrf1                     | -- | intronic |

Abbreviations: SNP, single nucleotide polymorphism; Chr, chromosome; DNase, deoxyribonuclease; eQTL, expression quantitative trait loci; dbSNP func annot, dbSNP function annotation;

<sup>a</sup> <http://regulomedb.org/>

<sup>b</sup> Haploreg: <https://pubs.broadinstitute.org/mammals/haploreg/haploreg.php>

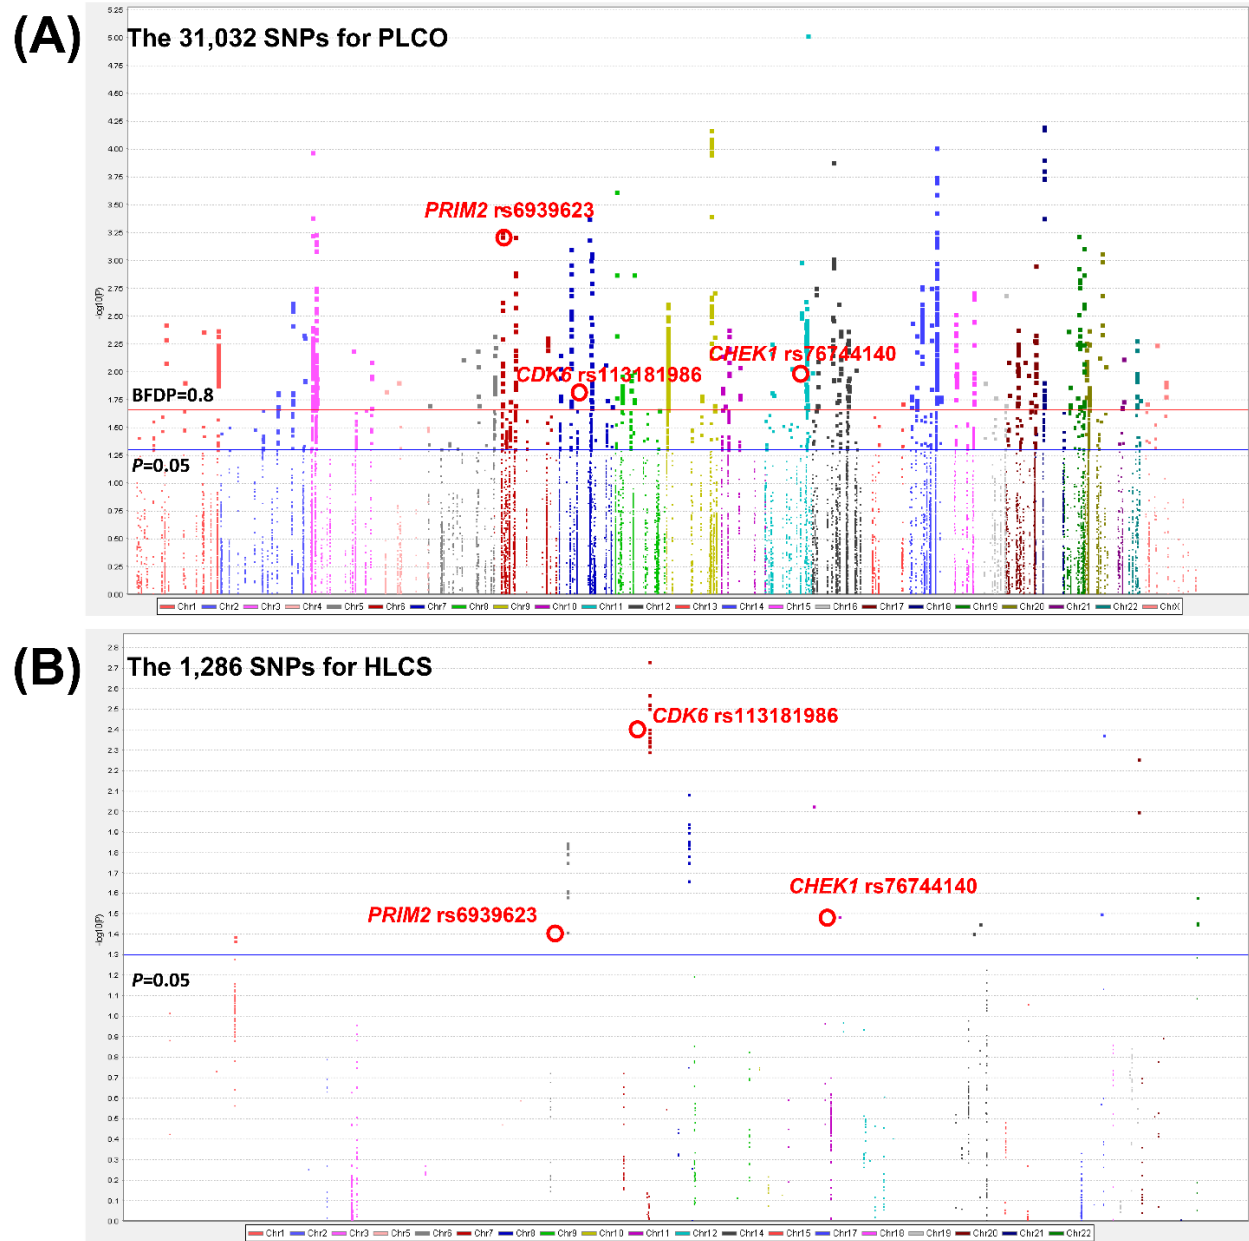

**Supplementary Figure S1.** Manhattan plot. **(A)** Manhattan plot for 31,032 SNPs of mitotic phase-related pathway genes in the PLCO trial; **(B)** Manhattan plot for 1,286 SNPs in the HLCS dataset. The blue horizontal line indicates  $P = 0.05$  and the red line indicates  $BFDP = 0.80$ . Abbreviations: PLCO, Prostate, Lung, Colorectal and Ovarian Cancer Screening Trial; HLCS, the Harvard Lung Cancer Susceptibility Study; BFDP, Bayesian false-discovery probability.

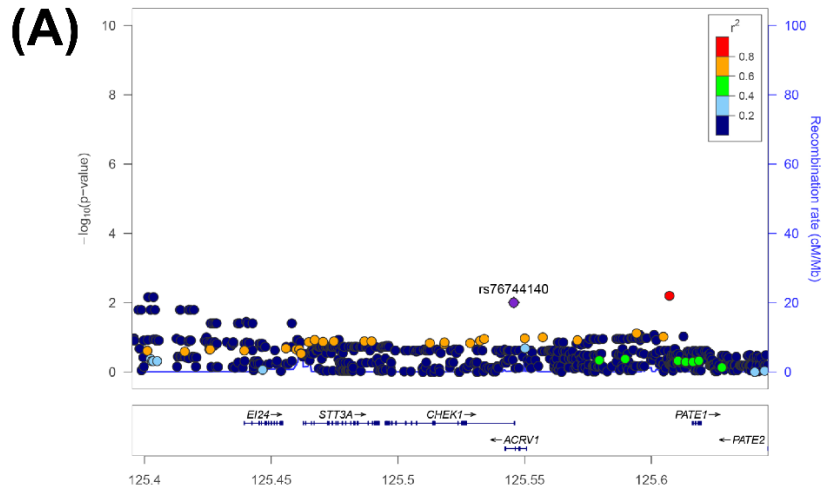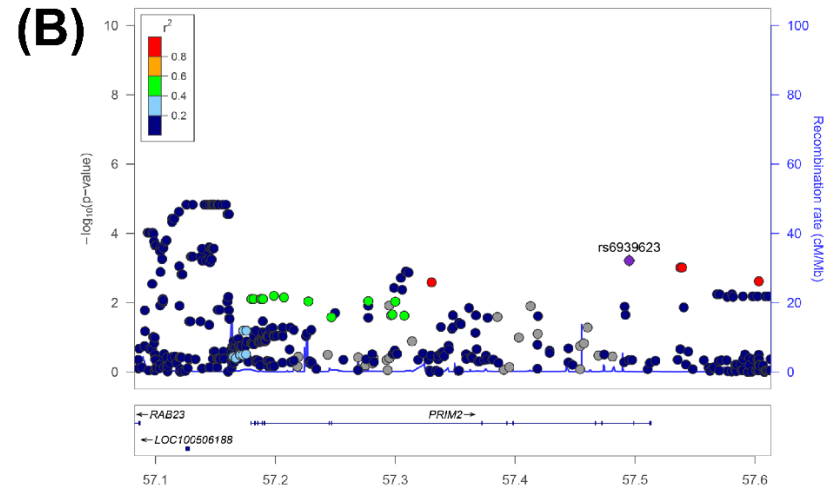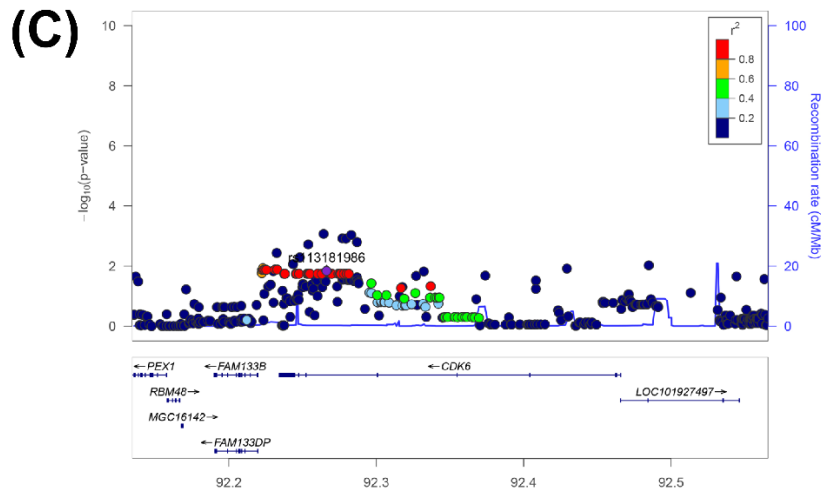

**Supplementary Figure S2.** Regional association plots for the three independent SNPs in the mitotic phase-related pathway genes. Regional association plots contained 100 kb up or downstream of *CHEK1* (A), *PRIM2* (B) and *CDK6* (C). Data points are colored according to the level of linkage disequilibrium of each pair of SNPs based on the hg19/1000 Genomes European population. The left-hand y-axis shows the association P-value of individual SNPs in the discovery dataset, which is plotted as  $-\log_{10}(P)$  against chromosomal base-pair position. The right-hand y-axis shows the recombination rate estimated from HapMap Data Rel 22/phase II European population.

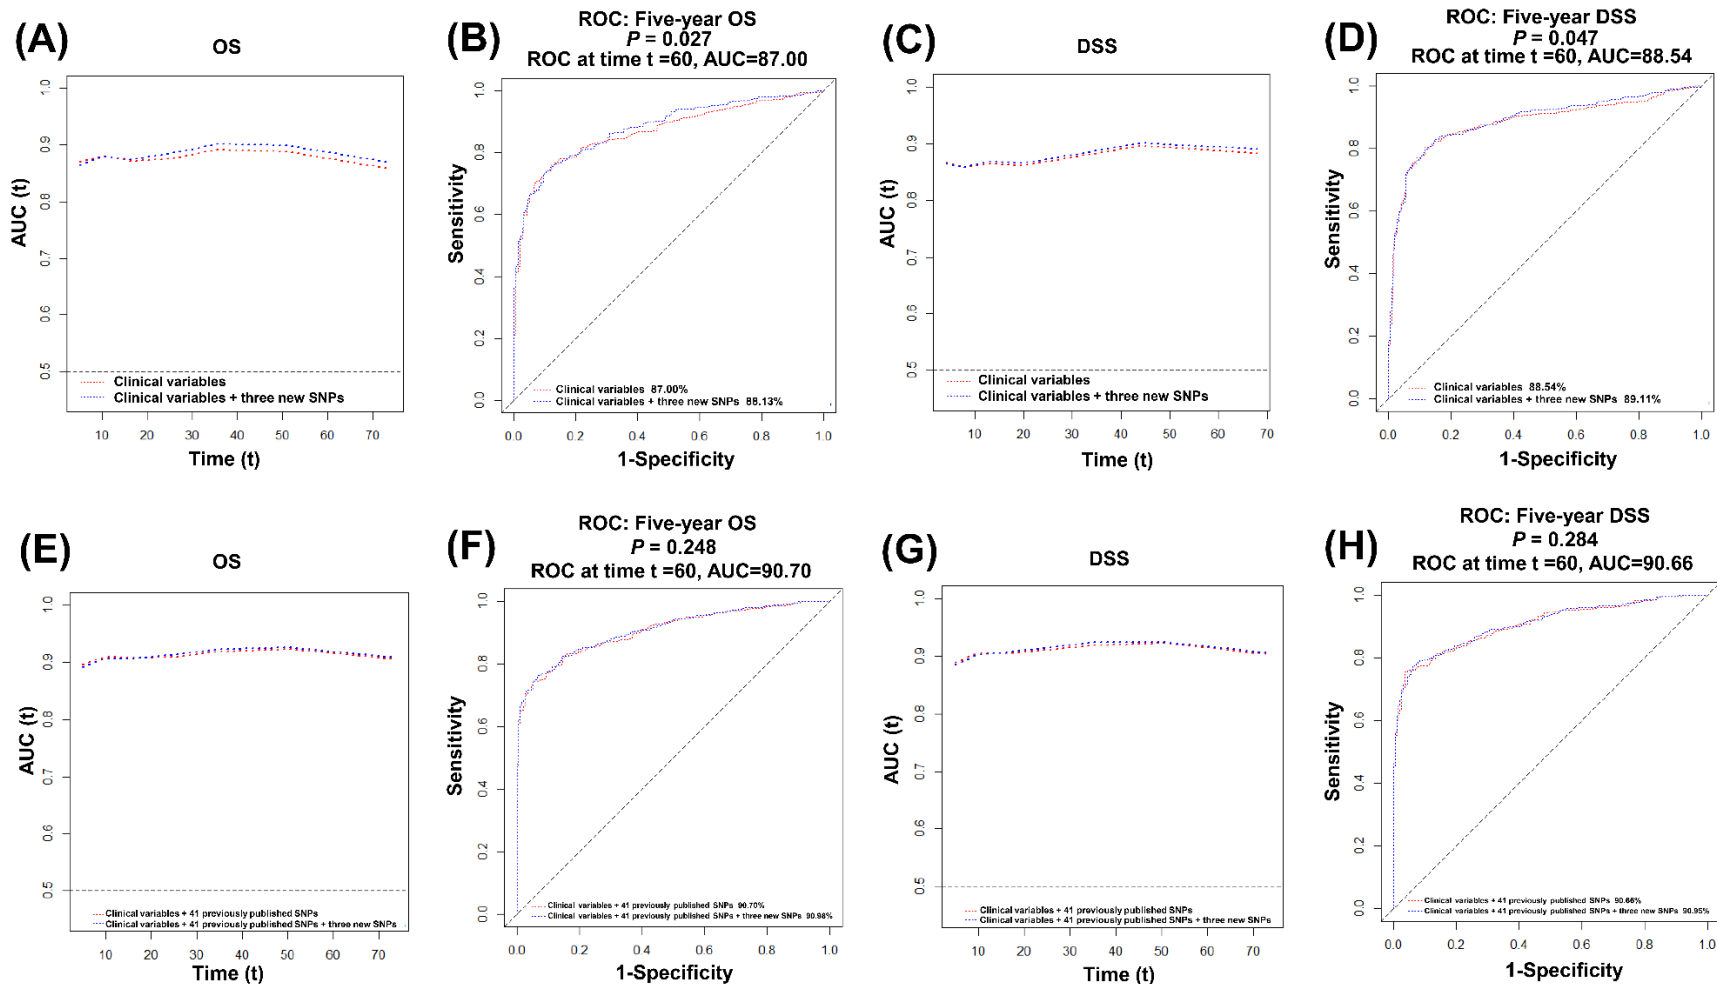

**Supplementary Figure S3.** Receiver operating characteristic (ROC) curve and time dependent area under the ROC curve (AUC) estimation for NSCLC OS and DSS prediction using three newly independent SNPs in the PLCO trial. The Five-year NSCLC OS prediction by time-dependent AUC (A) and ROC curve based on clinical variables plus three new SNPs (B), red line indicates clinical variables 87.00%; blue line indicates clinical variables plus three new SNPs 88.13%; time  $t$  = time (months). The Five-year NSCLC DSS prediction by time-dependent AUC (C) and ROC curve based on clinical variables plus three new SNPs (D), red line indicates clinical variables 88.54%; blue line indicates clinical variables plus new SNPs 89.11%; time  $t$  = time (months). The Five-year NSCLC OS prediction by time-dependent AUC (E) and ROC curve based on clinical variables and 41 previously published SNPs plus three new SNPs (F), red line indicates clinical variables plus 41 previously published

SNPs 90.70%; blue line indicates clinical variables and 41 previously published SNPs plus three new SNPs 90.98%; time t = time (months). The Five-year NSCLC DSS prediction by time-dependent AUC (**G**) and ROC curve based on clinical variables and 41 previously published SNPs plus three new SNPs (**H**), red line indicates clinical variables plus 41 previously published SNPs 90.66%; blue line indicates clinical variables and 41 previously published SNPs plus three new SNPs 90.95%. Abbreviations: OS, Overall survival; DSS, disease-specific survival; NSCLC, Non-small cell lung cancer; PLCO, The Prostate, Lung, Colorectal, and Ovarian Cancer Screening Trial.



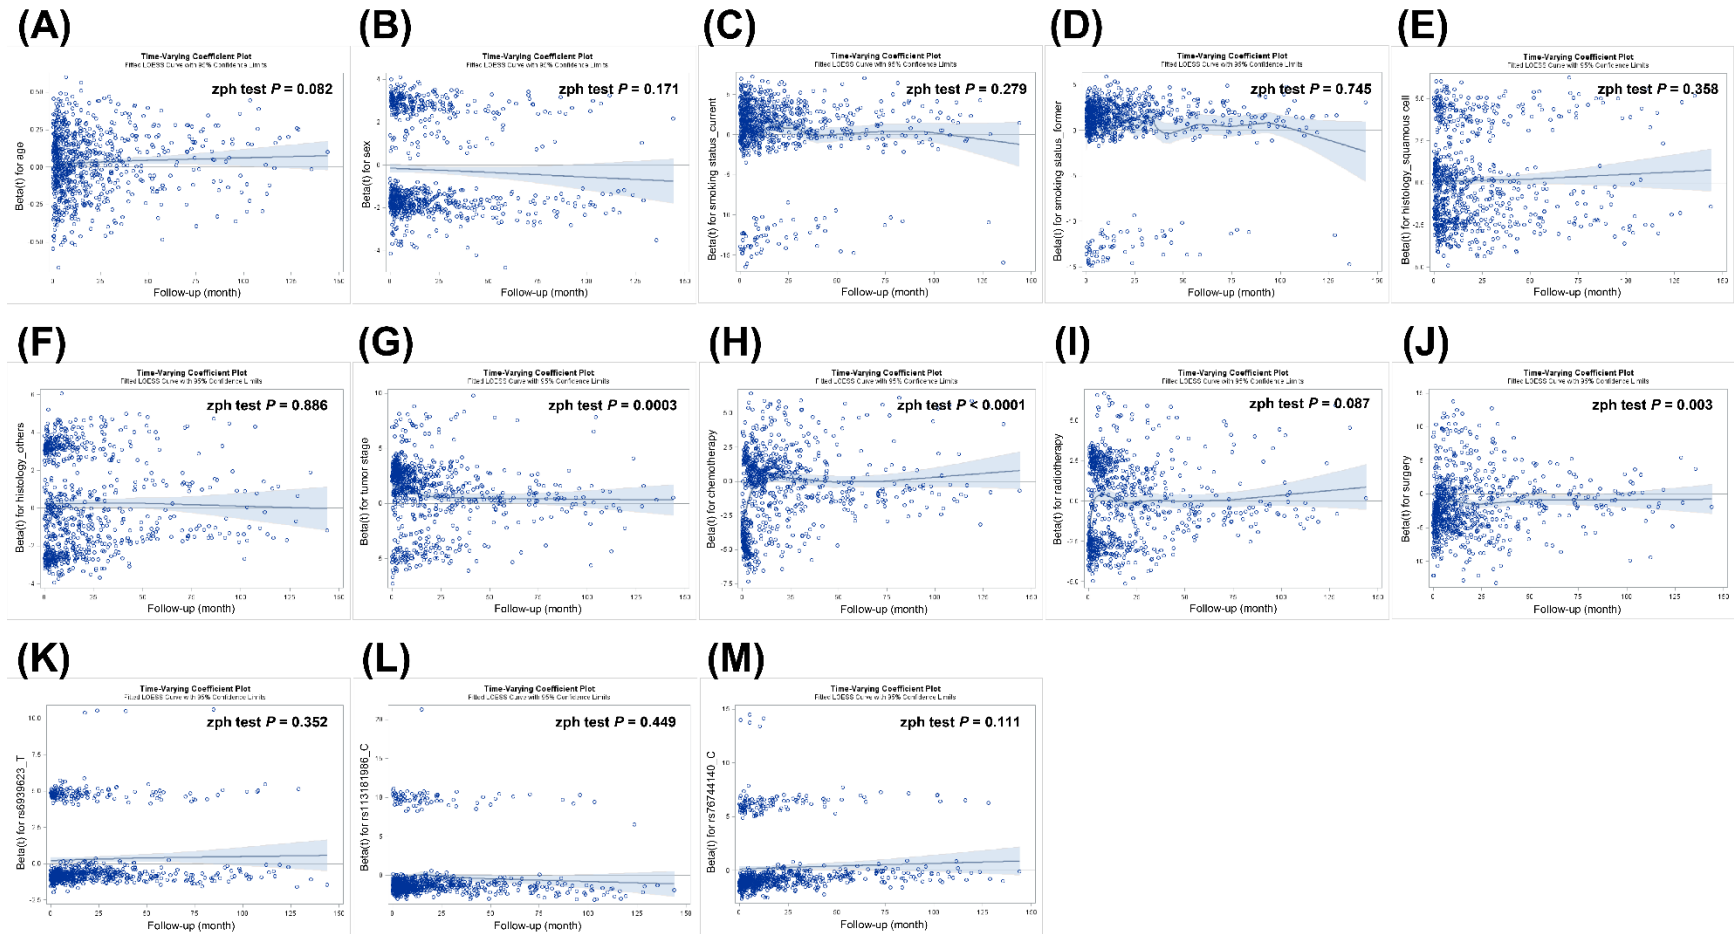

**Supplementary Figure S4.** Testing proportional Hazards assumption by using Schoenfeld residuals plot and zph test for (A) age; (B) sex; (C) smoking status (current); (D) smoking status (former); (E) histology (squamous cell); (F) histology (others); (G) stage; (H) chemotherapy; (I) radiotherapy; (J) surgery; (K) rs6939623; (L) rs113181986; (M) rs76744140.

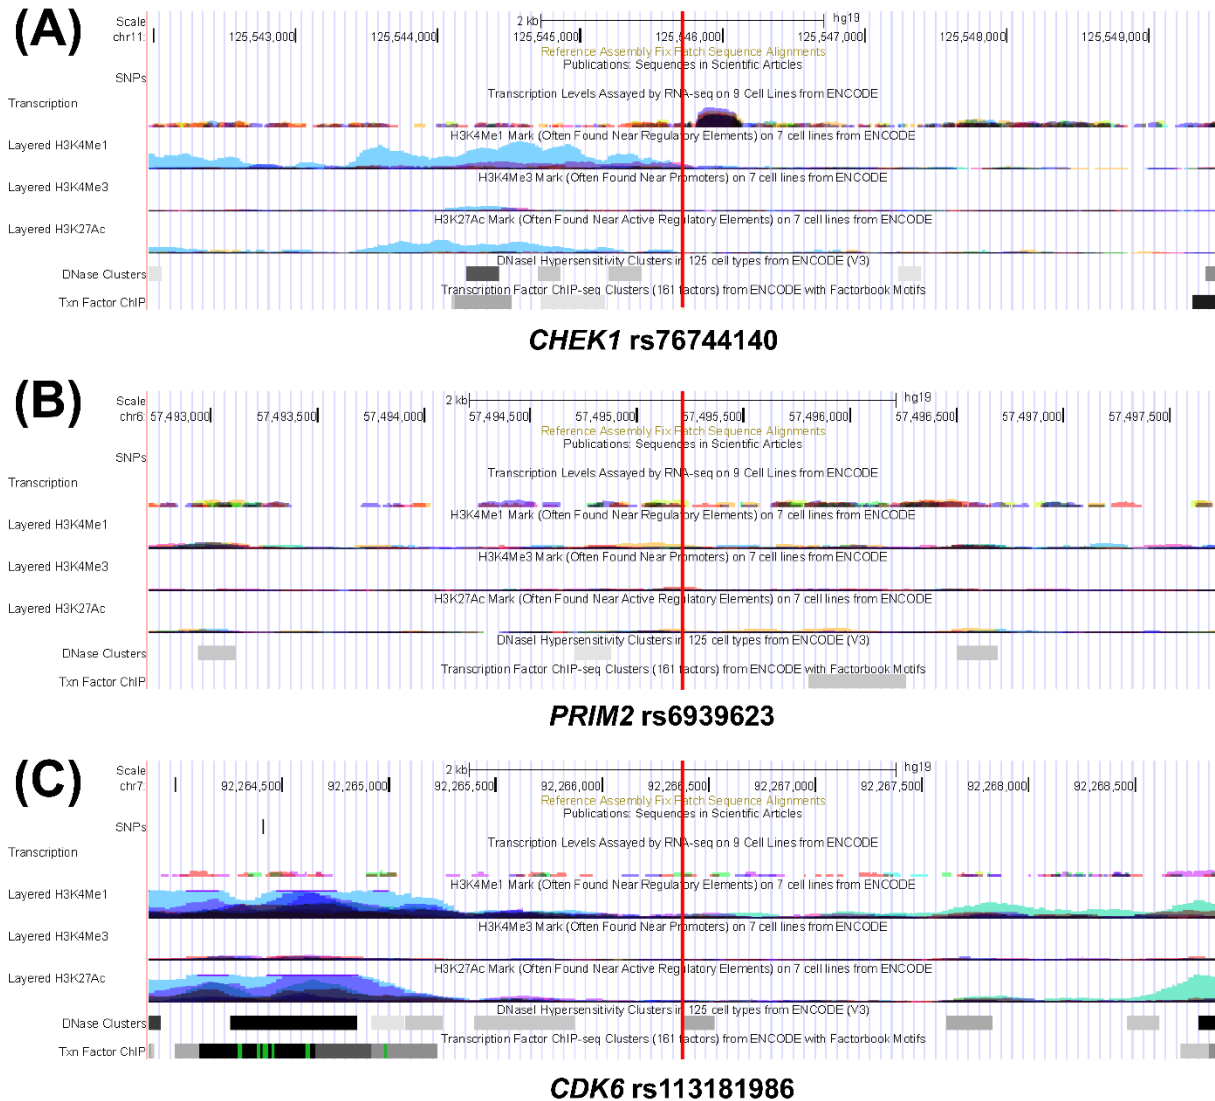

**Supplementary Figure S5.** Functional prediction of three independent SNPs in mitotic phase-related pathway genes in the ENCODE data. Location and functional prediction of *CHEK1* rs76744140 **(A)**. Location and functional prediction of *PRIM2* rs6939623 **(B)**. Location and functional prediction of *CDK6* rs113181986 **(C)**. The H3K4Me3, H3K4Me1, and H3K27Ac tracks showed the genome-wide levels of enrichment of acetylation of lysine 27, the mono-methylation of lysine 4, and tri-methylation of lysine 4 of the H3 histone protein. DNase clusters track showed DNase hypersensitivity areas. Txn factor track showed regions of transcription factor binding of DNA. Abbreviations: ENCODE, Encyclopedia of DNA Elements; SNP, single nucleotide polymorphism.

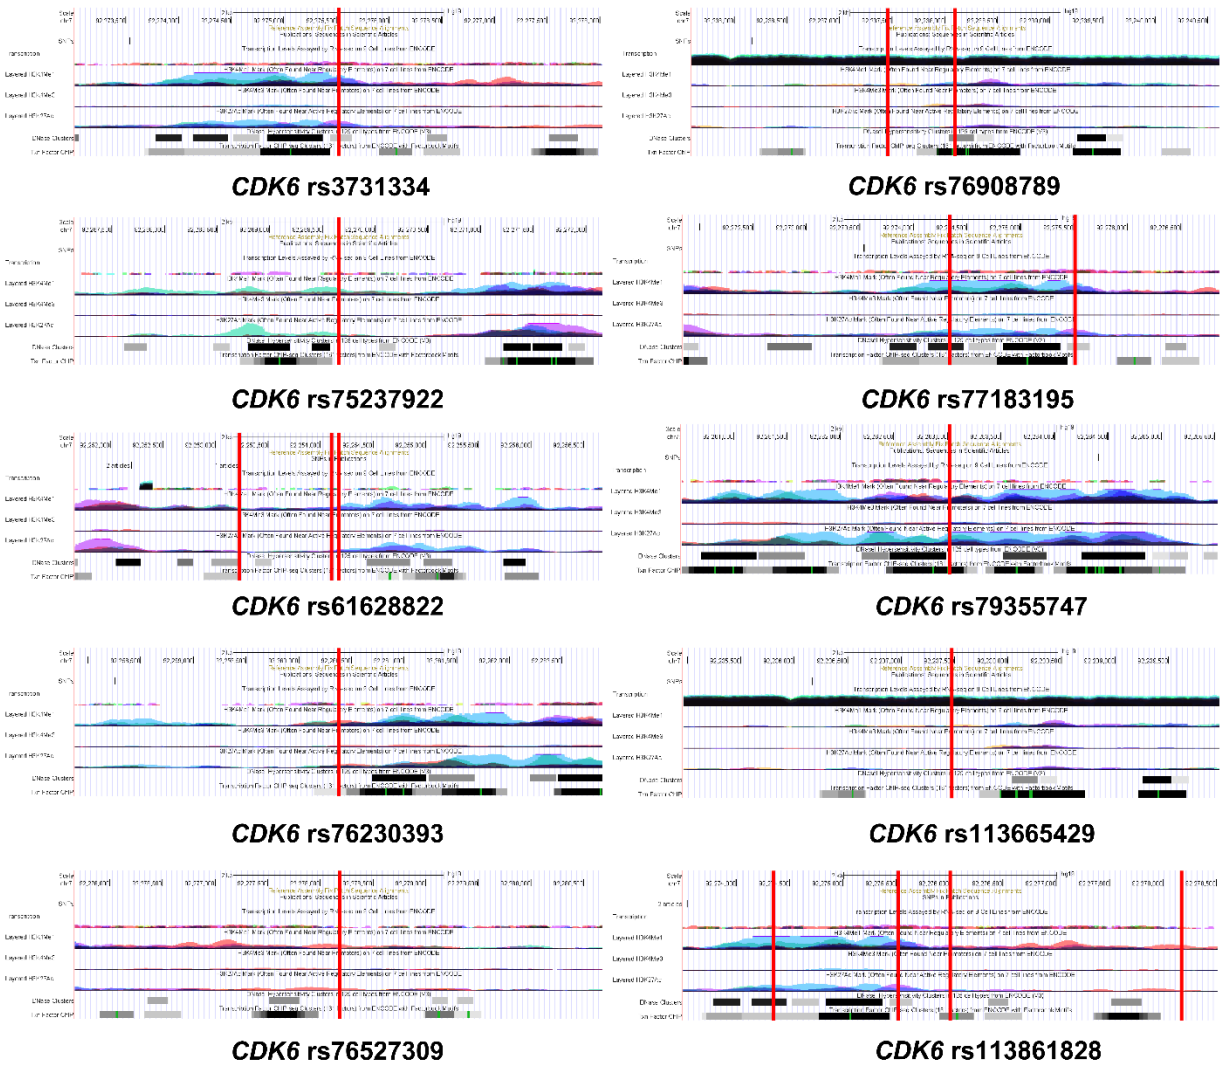

**Supplementary Figure S6.** Functional prediction of 10 high LD ( $r^2 > 0.8$ ) SNPs of representative SNP rs113181986 in *CDK6* in the ENCODE data. The H3K4Me3, H3K4Me1, and H3K27Ac tracks showed the genome-wide levels of enrichment of acetylation of lysine 27, the mono-methylation of lysine 4, and trimethylation of lysine 4 of the H3 histone protein. DNase clusters track showed DNase hypersensitivity areas. Txn factor track showed regions of transcription factor binding of DNA. Abbreviations: ENCODE, Encyclopedia of DNA Elements; SNP, single nucleotide polymorphism; LD, linkage disequilibrium.

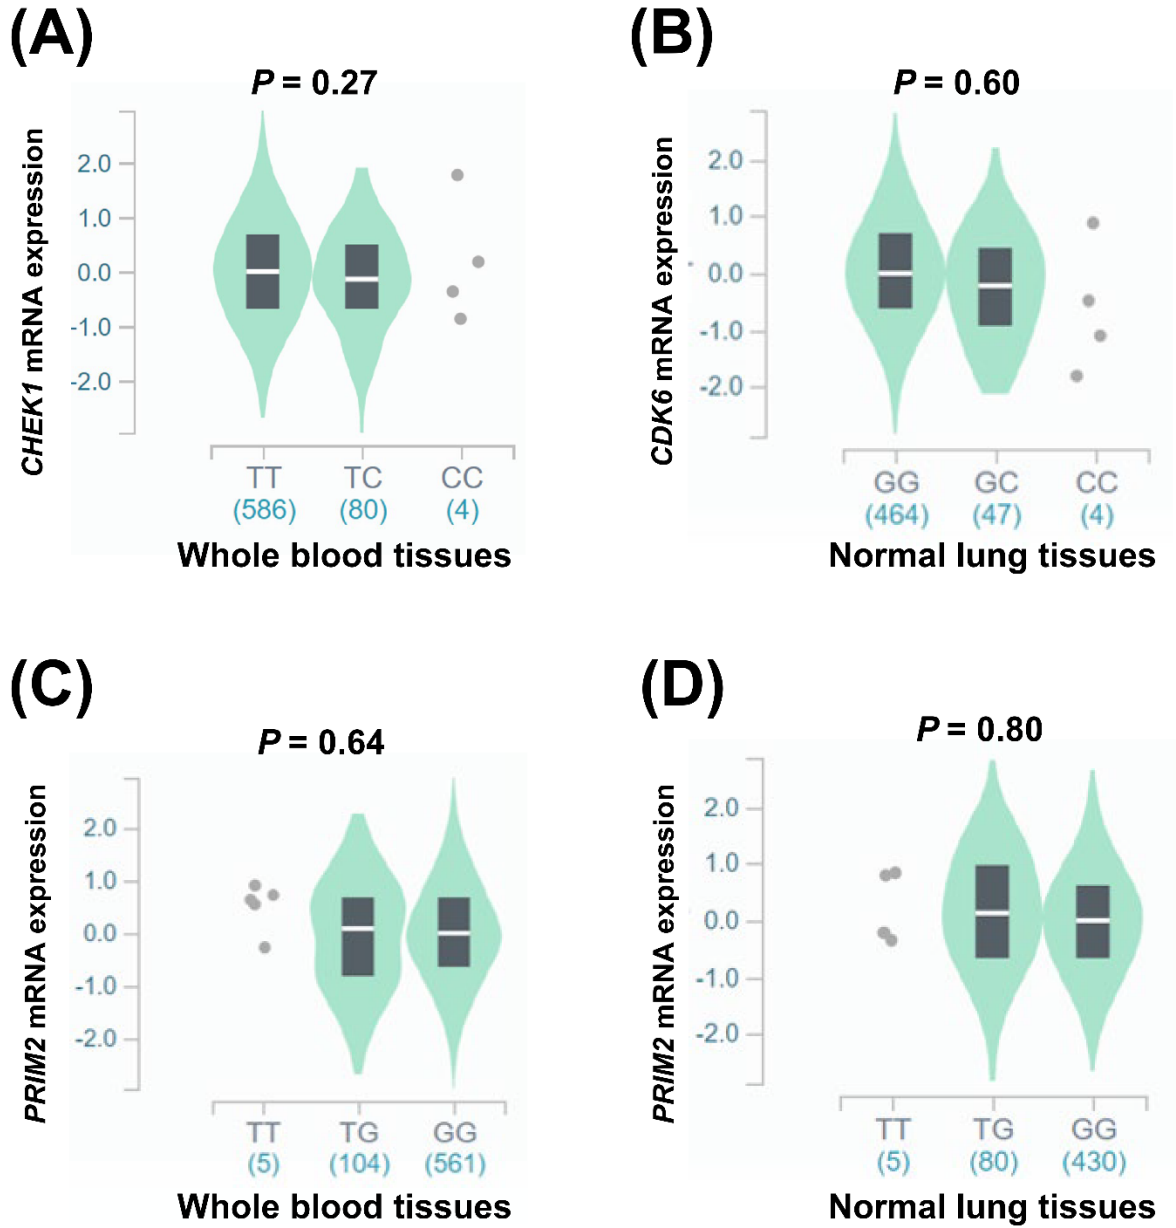

**Supplementary Figure S7.** The eQTL analysis for *CHEK1* rs76744140, *PRIM2* rs6939623, and *CDK6* rs113181986 from the GTEx (V8) database. **(A)** The correlation of rs76744140 genotypes and *CHEK1* mRNA expression in whole blood tissues; **(B)** The correlation of rs113181986 genotypes and *CDK6* mRNA expression in normal lung tissues; **(C)** The correlation of rs6939623 genotypes and *PRIM2* mRNA expression in whole blood tissues; **(D)** The correlation of rs6939623 genotypes and *PRIM2* mRNA expression in normal lung tissues. Abbreviations: eQTL, expression quantitative trait loci; GTEx, Genotype Tissue Expression project.

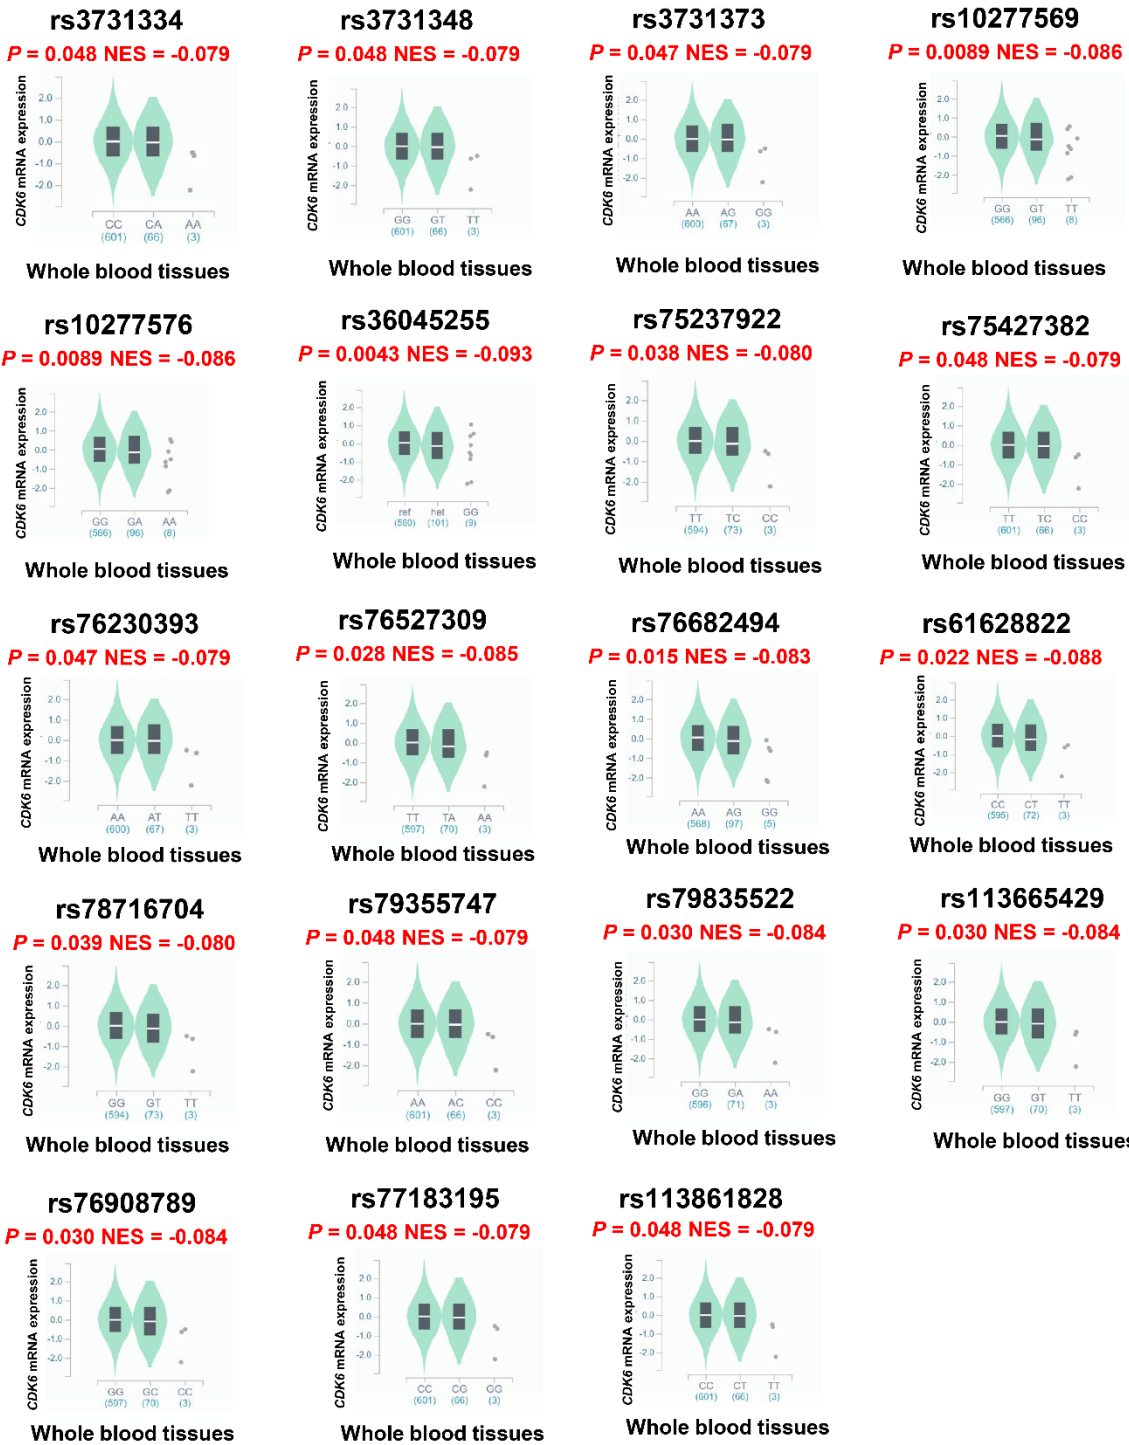

**Supplementary Figure S8.** The eQTL analysis for 19 SNPs had a high LD ( $r^2 > 0.8$ ) with rs113181986 in *CDK6* from the GTEx (V8) database. The correlation of the 19 SNPs genotypes and *CDK6* mRNA expression in whole blood tissues.

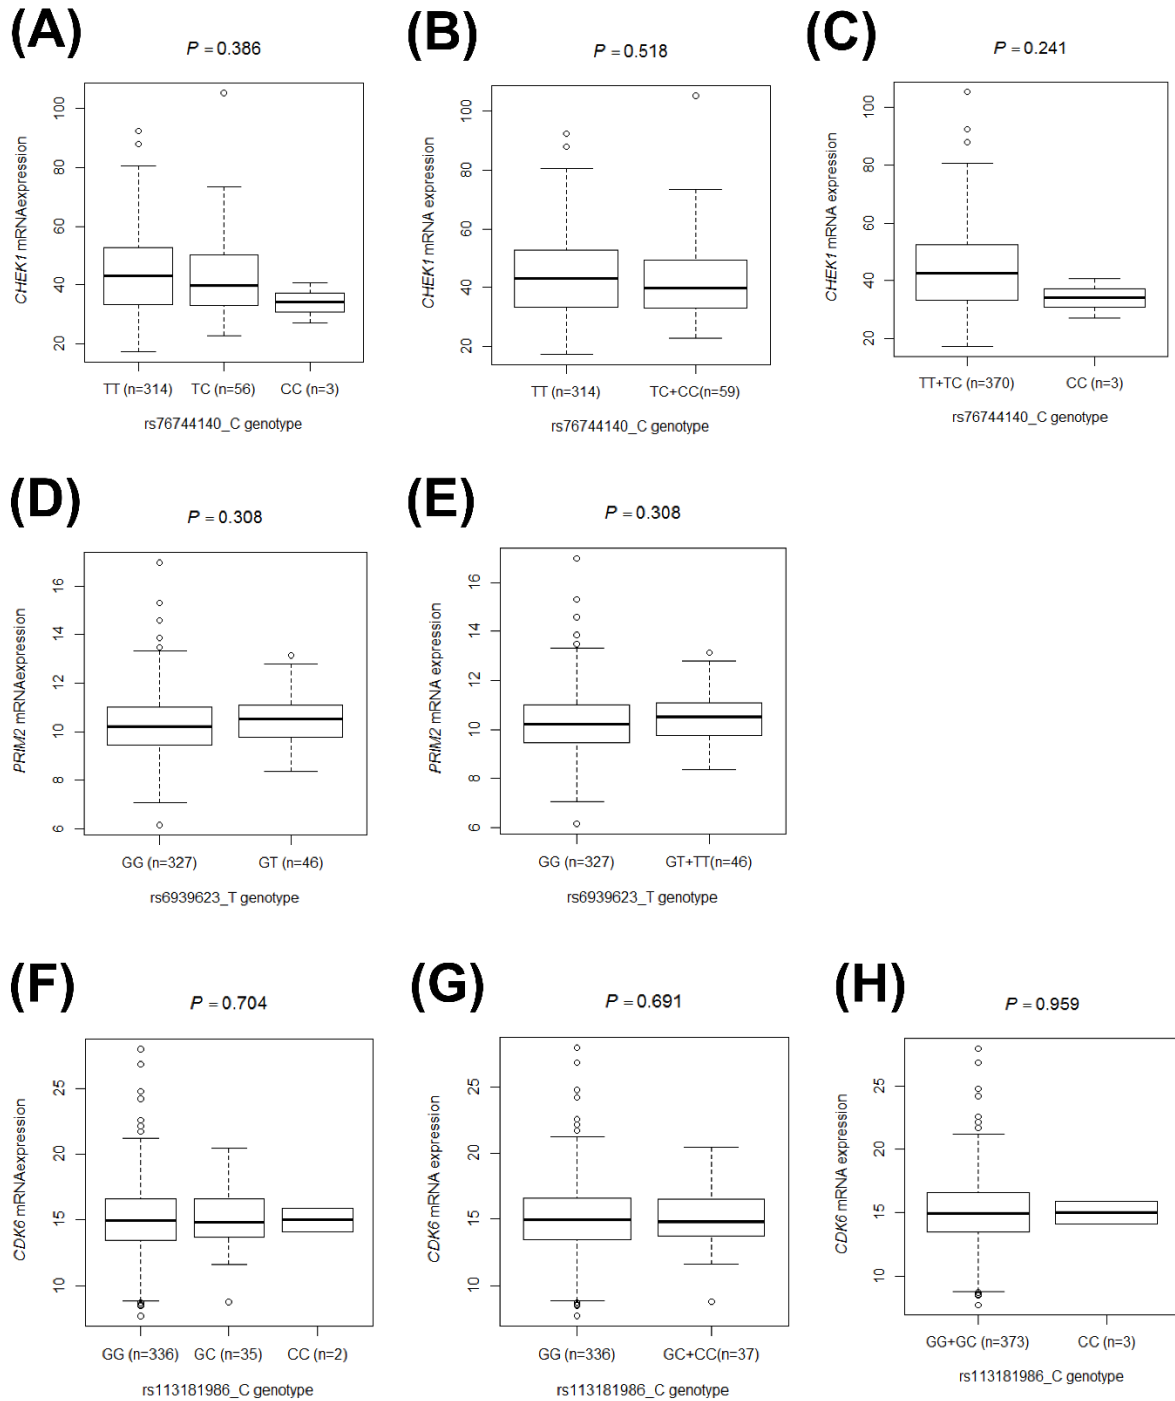

**Supplementary Figure S9.** The eQTL analysis for *CHEK1* rs76744140, *PRIM2* rs6939623, and *CDK6* rs113181986 from 1,000 Genomes Project. The correlation of rs76744140 genotypes and *CHEK1* mRNA expression in the additive (A), dominant (B) and recessive (C) model, respectively. The correlation of rs6939623 genotypes and *PRIM2* mRNA expression in the additive (D) and dominant (E) model, respectively. The correlation of rs113181986 genotypes and *CDK6* mRNA expression in the additive (F), dominant (G) and recessive (H) model, respectively.

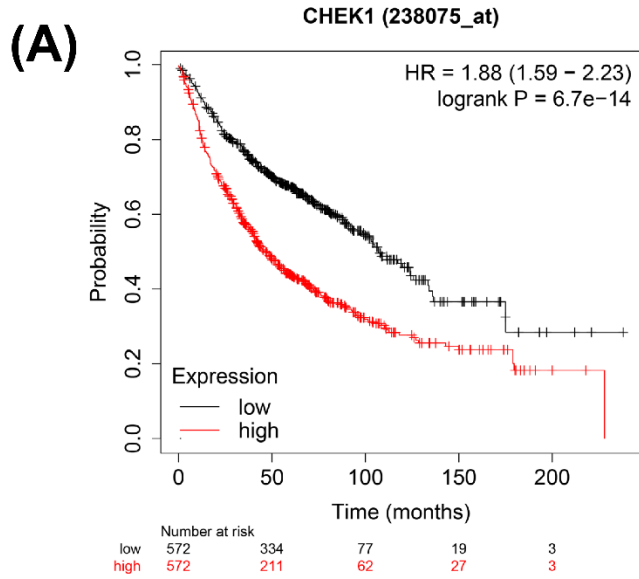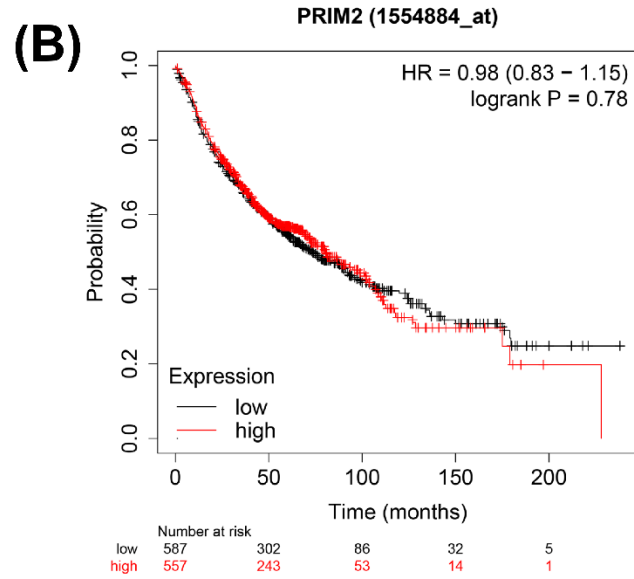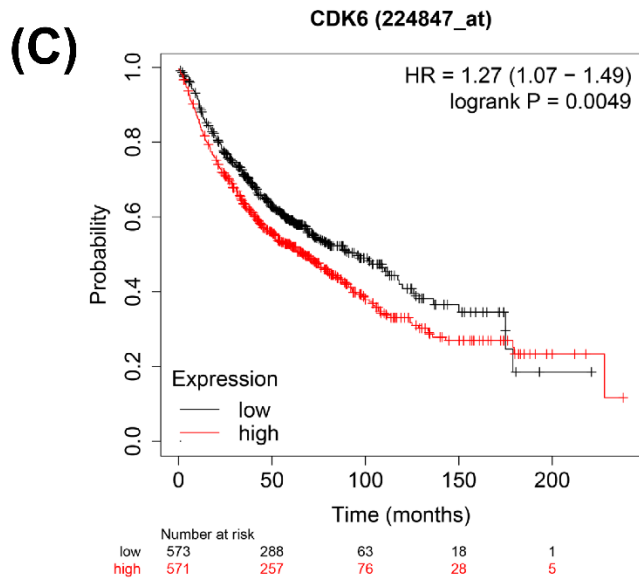

**Supplementary Figure S10.** Kaplan-Meier analysis for patients with NSCLC by the three genes. Based on online survival analysis software, **(A)** high *CHEK1* expression was associated with worse survival of patients with NSCLC; **(B)** *PRIM2* expression were not significantly associated with survival of patients with NSCLC; **(C)** high *CDK6* expression was associated with worse survival of patients with NSCLC. Abbreviations: NSCLC, non-small cell lung cancer. the online Kaplan-Meier plotter was obtained from <http://kmplot.com/analysis/>.

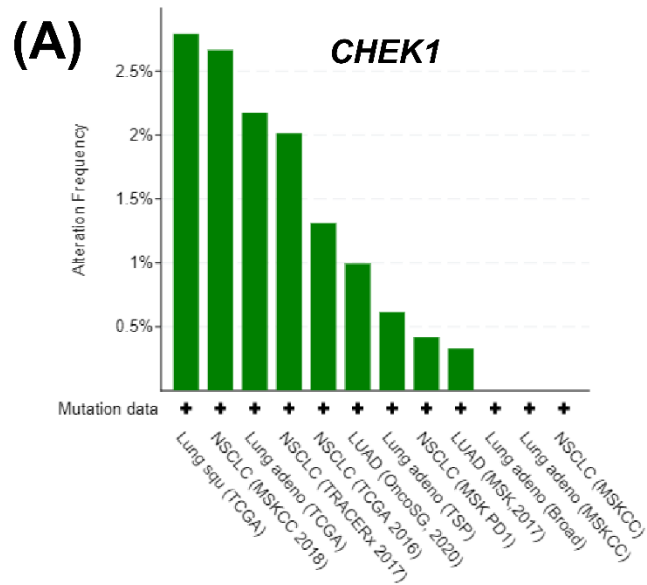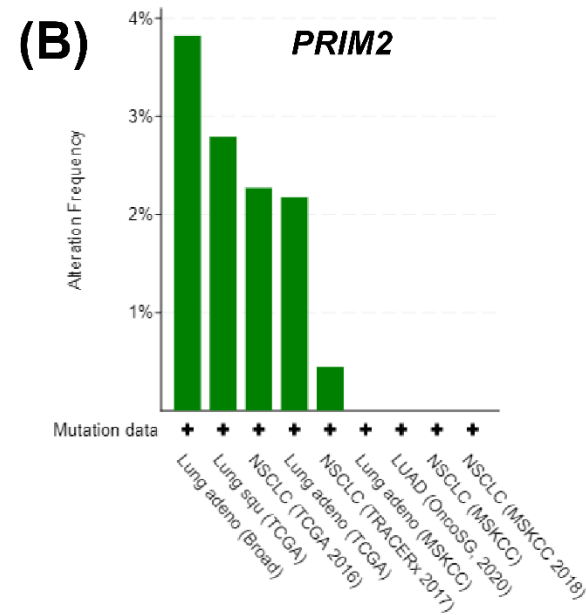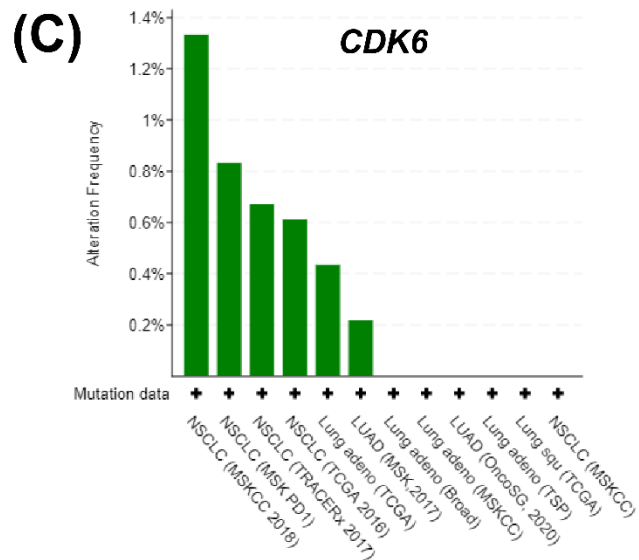

**Supplementary Figure S11.** Mutation frequency of *CHEK1*, *PRIM2*, and *CDK6* in non-small cell lung tumor tissues. **(A)** Mutation frequency of *CHEK1* in NSCLC, LUAD and LUSC using the online database of the cBioPortal for Cancer Genomics; **(B)** Mutation frequency of *PRIM2* in NSCLC, LUAD and LUSC using the online database of the cBioPortal for Cancer Genomics; **(C)** Mutation frequency of *CDK6* in NSCLC, LUAD and LUSC using the online database of the cBioPortal for Cancer Genomics. Abbreviations: NSCLC, non-small cell lung cancer; LUAD, Lung adenocarcinoma; LUSC, Lung squamous cell carcinoma. The online cBioPortal for Cancer Genomics database was obtained from <http://www.cbioportal.org>.
